# Supplementary material for: Interconnectedness of the Grinnellian and Eltonian Niche in Regional and Local Plant-Pollinator Communities
Source: Front Plant Sci. 2019 Nov 6;10:1371. doi: 10.3389/fpls.2019.01371 (PMC6856639; doi:10.3389/fpls.2019.01371)
Supplement: Supplementary file 4 [file Table_4.xlsx]

## Sheet: Blatt1
Junker et al.
Supporting Information 4
Mean trait values of plant species
Species	Nectar depth [mm]	Nectar width [mm]	Relative anther position [mm]
Achillea atrata	2.35143	0.727143	-0.398571
Achillea millefolium	1.37286	0.599048	-0.461429
Acinos arvensis	12.2357	3.13429	-0.875714
Aconitum tauricum	11.4159	9.44314	-10.4076
Ajuga pyramidalis	8.70429	2.16857	-0.0928571
Alchemilla coriacea	1.878	0.823	0.305
Alchemilla vulgaris	1.44744	0.694419	0.0165116
Androsace obtusifolia	2.99786	0.832143	-1.505
Arabis alpina	4.0115	2.409	-0.254
Arenaria ciliata	2.51	3.129	0.323
Aster bellidiastrum	2.75	0.581765	-0.288235
Astragalus alpinus	9.346	3.161	-7.267
Bartsia alpina	13.5007	2.28071	-0.774286
Bellis perennis	1.26792	0.675	0.211667
Bisquitella laevigata	2.34286	1.27429	0.965714
Calluna vulgaris	2.053	2.904	-0.727
Caltha palustris	0	0	-1.26714
Campanula barbata	16.4764	11.0529	-11.4621
Campanula rotundifolia	14.1067	8.23147	-11.144
Campanula scheuchzeri	14.3948	10.5168	-11.1575
Capsella bursa-pastoris	1.32857	1.14	-0.834286
Cardamine amara	0	0	-0.009
Carduus defloratus	11.4143	0.549	-2.55143
Carlina acaulis	10.57	1.04	1.91143
Carum carvi	0	0	0.534706
Centaurea jacea	12.0586	1.30857	0.767143
Cerastium fontanum	0	0	-2.628
Cerastium uniflorum	0	0	-1.876
Cirsium acaule	10.23	1.42286	3.25286
Cirsium spinosissimum	14.8171	1.13714	0.594286
Comastoma nanum	6.207	2.611	-4.039
Crepis aurea	4.09147	0.893235	-6.50206
Crepis conyzifolia	4.04143	0.802857	-5.37143
Doronicum glaciale	3.05412	1.14529	-0.0258824
Dryas octopetala	0	0	-4.04
Erigeron uniflorus	3.798	0.458	-0.48
Euphrasia minima	5.43804	1.80964	-0.656429
Euphrasia officinalis	5.88118	1.32	-1.03941
Euphrasia rostkoviana	5.9	1.263	-1.484
Fragaria vesca	0	0	0.688571
Galeopsis tetrahit	12.735	1.39333	-0.968333
Galium anisophyllum	0.638571	0.708571	-0.282857
Galium mollugo	0.858824	2.10059	0.335882
Galium pumilum	0.981905	2.72762	-0.102857
Gentiana acaulis	42.671	15.0038	-13.0757
Gentiana germanicum	20.7657	7.40429	-5.49143
Gentiana nivalis	17.348	2.821	-2.319
Gentiana verna	22.2645	2.54575	-6.01602
Geranium sylvaticum	0	0	-4.9425
Geum montanum	0	0	-2.91588
Heliathemum nummularium	0	0	4.841
Hieracium alpinum	5.486	0.538	-8.6825
Hieracium lactucella	2.28857	0.487143	-1.48
Hieracium murorum	2.88143	0.44	-2.61286
Hieracium pilosella	3.45	0.614286	-1.70857
Homogyne alpina	5.35221	0.81	0.738286
Hypericum maculatum	0	0	-0.126071
Leontodon autumnalis	3.97902	0.493413	-4.0945
Leontodon hispidus	5.35465	0.95662	-5.56915
Leucanthemopsis alpina	2.28965	0.651176	-0.404706
Leucanthemum vulgare	2.17585	0.607412	-0.183471
Ligusticum mutellina	0	0	0.592857
Linaria alpina	14.5988	3.65235	-3.45
Lloydia serotina	5.80929	5.86714	-2.09643
Loiseleuria procumbens	2.33238	2.05381	-0.785714
Lotus corniculatus	7.48857	2.67714	-0.812143
Maianthemum bifolium	0	3.71571	1.14143
Minuartia geradii	2.71429	8.36	0.561429
Minuartia rupestris	2.343	2.163	1.656
Minuartia sedoides	1.9665	4.331	0.5545
Moehringia ciliata	2.166	2.736	0.568
Myosotis alpestris	3.10536	1.06607	-1.51357
Myosotis sylvatica	3.00636	0.806364	-0.975455
Parnassia palustris	0	0	-1.52393
Pedicularis aspleniifolia	10.5676	1.65588	-0.0335294
Phyteuma globularifolium	3.4798	2.375	-2.262
Phyteuma hemisphaericum	11.13	1.945	-2.513
Pimpinella major	0	0	0.808421
Plantago lanceolata	3.66917	0.745	3.83333
Plantago media	2.33736	0.892857	8.07693
Polygala vulgaris	2.97824	0.730588	-0.888824
Polygonum viviparum	2.187	1.76067	-1.0295
Potentilla aurea	0	0	0.561842
Potentilla crantzii	0	0	-1.5
Potentilla erecta	0	0	1.3713
Primula minima	11.0769	3.26036	-13.5184
Pritzelago alpina	1.454	0.826	-0.148
Prunella vulgaris	7.36412	2.51712	-0.727059
Pseudorchis albida	5.036	2.029	-3.986
Pulsatilla alpina	0	0	-5.83646
Ranunculus acris	0	0	-3.09791
Ranunculus alpestris	0	0	-1.568
Ranunculus montanum	0	0	-4.57479
Ranunculus repens	0	0	-0.772857
Rhinanthus glacialis	9.4895	2.132	-1.1765
Rhododendron ferrugineum	10.284	3.941	-5.28
Rumex alpestris	0	0	0.522917
Rumex alpinus	0	0	-0.423529
Saxifraga aizoides	0	0	1.05882
Saxifraga androsacea	3.85857	2.66286	-1.35214
Saxifraga moschata	0	0	-1.126
Saxifraga oppositifolia	3.82714	3.19286	-1.21
Saxifraga paniculata	0	0	-1.029
Saxifraga rotundifolia	0	0	-0.401429
Saxifraga stellaris	0	0	-1.22941
Scabiosa columbaria	5.58714	1.58786	-0.687857
Sempervivum montanum	4.785	4.936	-2.427
Silene acaulis	5.98739	2.41087	0.0317391
Silene dioica	14.31	2.32833	-8.325
Silene nutans	13.8341	2.08471	0.453529
Silene vulgaris	13.8304	5.06074	-0.08
Soldanella pusilla	11.7748	6.56333	-7.68762
Stellaria graminea	3.28705	8.31795	0.0113636
Stellaria nemorum	5.3	2.1	-1.43
Taraxacum officinale	4.53471	0.476471	-5.46588
Thymus praecox	4.18843	1.33492	0.141803
Tofieldia calyculata	0	0	0.894
Trifolium badium	4.41417	0.897917	-4.97375
Trifolium pratense	9.66787	1.7077	-2.18426
Trifolium repens	4.94258	1.63581	-2.23435
Trollius europaeus	30.1529	30.1514	-5.75
Vaccinium myrtillus	4.42292	2.225	-1.29875
Vaccinium vitis-idea	4.605	3.79912	-2.85824
Veratrum album	9.927	14.792	-5.624
Veronica alpina	2.63267	2.466	-1.22133
Veronica chamaedrys	1.55933	1.04933	2.59767
Veronica officinalis	1.76571	1.40071	0.45
Veronica serpyllifolia	2.20955	1.605	0.92
Viola biflora	4.35556	2.20611	-0.8425
Viola canina	7.09235	3.82294	-0.0805882
